# Supplementary material for: Huntingtin interacts with REST/NRSF to modulate the transcription of NRSE-controlled neuronal genes
Source: Springer Nature journal article supplement (doi:10.1038/ng1219), 2003-07-25
Supplement: 41588_2003_BFng1219_MOESM1_ESM.pdf [file 41588_2003_BFng1219_MOESM1_ESM.pdf]

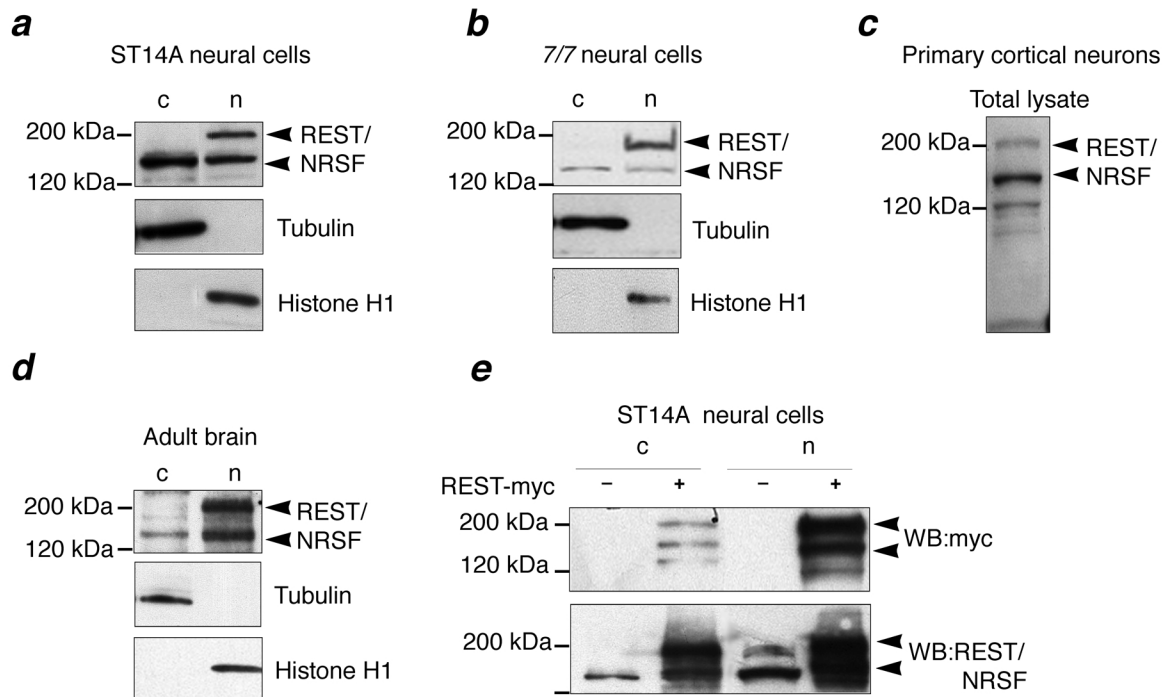

**Supplementary Fig. 1:** REST/NRSF is present in neural cells. REST/NRSF protein is detected in the cytoplasm (c) and nucleus (n) of (a) ST14A neural cells, (b) 7/7 neural cells, (c) in total lysate from primary neurons prepared from embryonic day 18 rat cerebral cortex and (d) in the cytoplasm (c) and nucleus (n) of adult mouse cerebral cortex. Two immunoreactive bands of 160/180 and 200 KDa were detected in the nuclear fraction and total lysate while only the 160/180 KDa band is present in the cytoplasmic fraction. (e) ST14A neural cells transfected with myc-tagged REST/NRSF full-length cDNA and subjected to western blotting with anti-myc (upper panel) or anti-REST 12C11-1 (lower panel) antibodies. Upper panel, no anti-myc immunoreactive bands were detected in the cytoplasm and nucleus of untransfected cells, as expected. Cytoplasmic and nuclear lysates of transfected cells show the same immunoreactive bands when blotted with either anti-myc or anti-REST 12C11-1 antibodies.
